# Supplementary material
Source: MDPI journal article supplement (https://www.mdpi.com/1424-8247/15/5/533)
Supplement: s1 [file s1]

## Supplementary Appendix.

**Table S1.** Baseline Characteristics by histological group.

| Characteristic                      | All patients (n=158) | Squamous (n=71) | Non-squamous (n=87) | p-value |
|-------------------------------------|----------------------|-----------------|---------------------|---------|
| Age, median (range), years          | 64 (37-86)           | 67 (45-81)      | 61 (37-86)          | <0.001‡ |
| Binary age at ICI beginning         |                      |                 |                     | <0.001* |
| ≤65                                 | 90 (57)              | 29 (40.8)       | 61 (70.1)           |         |
| >65                                 | 68 (43)              | 42 (59.2)       | 26 (29.9)           |         |
| Sex                                 |                      |                 |                     | 0.202*  |
| Male                                | 124 (78.5)           | 59 (83.1)       | 65 (74.7)           |         |
| Female                              | 34 (21.5)            | 12 (16.9)       | 22 (25.3)           |         |
| ECOG at ICI initiation              |                      |                 |                     | 0.215*  |
| 0-1                                 | 134 (84.8)           | 63 (88.7)       | 71 (81.6)           |         |
| ≥2                                  | 24 (15.2)            | 8 (11.3)        | 16 (18.4)           |         |
| Metastasis CNS                      | 26 (16.5)            | 5 (7)           | 21 (24.1)           | 0.004*  |
| COPD                                | 45 (28.8)            | 26 (36.6)       | 19 (21.8)           | 0.041*  |
| PD-L1 (positive ≥1% tumor cells)    |                      |                 |                     | 0.107*  |
| Yes                                 | 60 (38.0)            | 26 (88.7)       | 34 (39.1)           |         |
| No                                  | 37 (23.4)            | 12 (16.9)       | 25 (28.7)           |         |
| Unknown                             | 61 (38.6)            | 33 (46.5)       | 28 (32.2)           |         |
| Smoking status                      |                      |                 |                     | 0.298*  |
| Never or +10 years former smokers   | 42 (26.6)            | 16 (22.5)       | 26 (29.9)           |         |
| Current or -10 years former smokers | 116 (73.4)           | 55 (77.5)       | 61 (70.1)           |         |

‡ p value for t student test, \* p value for Chi-squared test; ECOG, Eastern Cooperative Oncology Group; CNS, central nervous system; COPD, Chronic Obstructive Pulmonary Disease

**Table S2.** Univariate analysis of baseline characteristics that were significantly different between nivolumab and atezolizumab groups.

| Parameter | Category      | Nivolumab |           |         |      |           |         | Atezolizumab |           |         |      |           |         |
|-----------|---------------|-----------|-----------|---------|------|-----------|---------|--------------|-----------|---------|------|-----------|---------|
|           |               | PFS       |           |         | OS   |           |         | PFS          |           |         | OS   |           |         |
|           |               | HR        | 95% CI    | p value | HR   | 95% CI    | p value | HR           | 95% CI    | p value | HR   | 95% CI    | p value |
| Age       | ≤65 vs. >65   | 1.08      | 0.68-1.70 | 0.742   | 1.03 | 0.63-1.69 | 0.901   | 1.25         | 0.69-2.24 | 0.456   | 0.94 | 0.50-1.79 | 0.860   |
| CNS met   | No vs. Yes    | 1.09      | 0.54-2.20 | 0.803   | 1.52 | 0.65-3.52 | 0.331   | 0.73         | 0.40-1.35 | 0.320   | 0.89 | 0.45-1.77 | 0.749   |
| Histology | Sq vs. non-sq | 1.58      | 0.96-2.60 | 0.072   | 1.54 | 0.91-2.63 | 0.108   | 1.21         | 0.64-2.26 | 0.556   | 1.93 | 1.00-3.72 | 0.050   |
| PD-L1     | - vs. +       | 1.43      | 0.68-3.02 | 0.341   | 0.99 | 0.42-2.32 | 0.986   | 1.20         | 0.67-2.14 | 0.536   | 1.17 | 0.61-2.22 | 0.640   |
|           | Unk vs. +     | 1.29      | 0.75-2.22 | 0.351   | 1.22 | 0.68-2.19 | 0.502   | 0.45         | 0.19-1.05 | 0.066   | 0.52 | 0.22-1.25 | 0.145   |

CNS met, central nervous system metastasis; PFS, progression free survival; OS, overall survival; HR, hazard ratio; CI, confidence interval.
